# Supplementary material
Source: PubMed Central journal article supplement (PMC4048332)
Supplement: NIHMS580422-supplement-1.pdf [file NIHMS580422-supplement-1.pdf]

**Journal:** Nature Medicine

|                       |                                                                                                        |
|-----------------------|--------------------------------------------------------------------------------------------------------|
| Article Title:        | <b>The <i>UPF1</i> RNA Surveillance Gene is Commonly Mutated in Pancreatic Adenosquamous Carcinoma</b> |
| Corresponding Author: | <b>YanJun Lu &amp; Miles F Wilkinson</b>                                                               |
|                       |                                                                                                        |

| Supplementary Item & Number | Title or Caption                                                                                                                      |
|-----------------------------|---------------------------------------------------------------------------------------------------------------------------------------|
| Supplementary Figure 1      | <b>An alternatively spliced p53 transcript is selectively expressed in an UPF1-deficient ASC tumor.</b>                               |
| Supplementary Figure 2      | <b>Supplementary Figure 2. Many <i>UPF1</i> mutations in ASC tumors are within or proximal to known splicing <i>cis</i> elements.</b> |
| Supplementary Figure 3      | <b>Endogenous NMD substrates are dramatically upregulated in ASC tumors.</b>                                                          |
| Supplementary Figure 4      | <b>Evidence that the <i>alt-PTC-IVS6-p53</i> mRNA encodes a dominant-negative p53 protein.</b>                                        |
| Supplementary Figure 5      | <b>p53 immunohistochemical analysis.</b>                                                                                              |
| Supplementary Table 1       | <b>Summary of 23 ASC patients.</b>                                                                                                    |
| Supplementary Table 2       | <b>Genomic <i>UPF1</i> mutations in pancreatic and lung tumors.</b>                                                                   |
| Supplementary Table 3       | <b>Primers used for <i>UPF1</i> DNA sequencing.</b>                                                                                   |
| Supplementary Table 4       | <b>RT-qPCR primers.</b>                                                                                                               |
| Supplementary Table 5       | <b>Primers used for <i>UPF1</i> mini-gene construction and analysis.</b>                                                              |
| Supplementary Table 6       | <b>Primers used for site-direct mutagenesis of the <i>UPF1</i> mini-gene.</b>                                                         |
| Supplementary Table 7       | <b>p53 siRNA sequences.</b>                                                                                                           |
| Supplementary Methods       |                                                                                                                                       |
| Supplementary References    |                                                                                                                                       |

-

## SUPPLEMENTARY INFORMATION

### The *UPF1* RNA Surveillance Gene is Commonly Mutated in Pancreatic Adenosquamous Carcinoma

**Chen Liu<sup>1,9</sup>, Rachid Karam<sup>2,9</sup>, YingQi Zhou<sup>3,9</sup>, Fang Su<sup>1,9</sup>, Yuan Ji<sup>4,9</sup>, Gang Li<sup>3</sup>, GuoTong Xu<sup>1</sup>, LiXia Lu<sup>1</sup>, ChongRen Wang<sup>1</sup>, MeiYi Song<sup>1</sup>, JingPing Zhu<sup>1</sup>, YiRan Wang<sup>1</sup>, YiFan Zhao<sup>1</sup>, Wai Chin Foo<sup>5</sup>, Mingxin Zuo<sup>6</sup>, Mark A Valasek<sup>7</sup>, Milind Javle<sup>6</sup>, Miles F Wilkinson<sup>2,8</sup> & YanJun Lu<sup>1</sup>**

<sup>1</sup>Clinical and Translational Research Center, The Tenth People's Hospital, Tongji University School of Medicine, 1239 Siping Road, Shanghai 200092, China.

<sup>2</sup>Department of Reproductive Medicine, School of Medicine, University of California San Diego, La Jolla, CA 92093

<sup>3</sup>The Third General Surgery Department, Changhai Hospital, Second Military Medical University, Shanghai 200433, China.

<sup>4</sup>Department of Pathology, Zhongshan Hospital, Fudan University, Shanghai 200032, China.

<sup>5</sup>Department of Pathology, University of Texas MD Anderson Cancer Center, Houston, TX 77030.

<sup>6</sup>Department of Gastrointestinal Medical Oncology, UT MD Anderson Cancer Center, Houston, TX 77030.

<sup>7</sup>Division of Anatomic Pathology, Department of Pathology, University of California San Diego, San Diego, CA 92103.

<sup>8</sup>Institute for Genomic Medicine, University of California San Diego, La Jolla, CA 92093

<sup>9</sup>These authors contributed equally to this work.

Correspondence should be addressed to Y.L. ([yanjunlu@hotmail.com](mailto:yanjunlu@hotmail.com)) & M.F.W. ([mfwilkinson@ucsd.edu](mailto:mfwilkinson@ucsd.edu)).

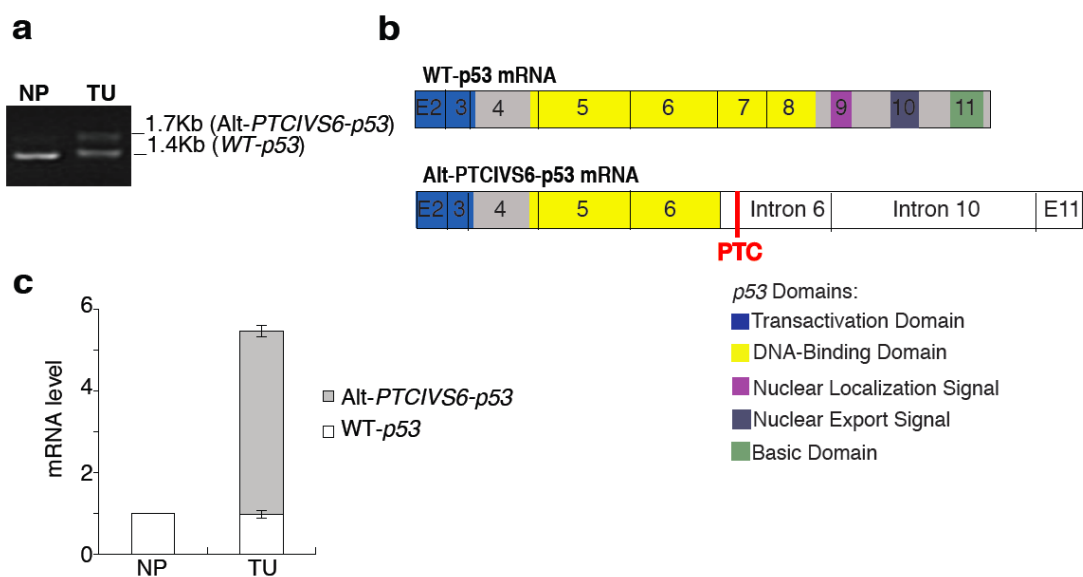

**Supplementary Figure 1. An alternatively spliced p53 transcript is selectively expressed in an UPF1-deficient ASC tumor.**

(a) RT-PCR analysis of p53 transcripts in ASC tumor (TU) tissue and the normal adjacent pancreatic tissue (NP) from patient 15 using the primer pair 5'-CTTTCCACGACGGTGACAC-3' / 5'-GCCAACTTGTTTCAGTGGAGC-3'. (b) Schematic representation of *p53* transcripts detected in patient 15, based on sequence analysis of RT-PCR products: 1408 nt (WT-p53 mRNA) and 1692 nt (Alt-PTC-IVS6-p53). The alternative splicing event occurs at a region of sequence identity in introns 6 and 10 (tgggaggccaaggc), resulting in skipping of exons 7~10 and inclusion of parts of introns 6 and 10. The encoded p53 protein has a reading frame that ends more than 200 nucleotides into intron 6. While unusual, this type of alternative splicing has also been observed in other mRNAs, including *MDM2* transcripts<sup>21</sup>. (c) RT-qPCR analysis of p53 transcripts using the primer pair 5'-CTGCTCAGATAGCGATGGTCTGGC-3' / 5'-TTGTAGTGGATGGTGGTACAGTCAG-3' for normally spliced p53 (WT-p53) and the primer pair 5'-TGGCTCATGCCTGTAATCCCAGCAC-3' / 5'-CCTCAGCCTCCCGAGTAGGTAGCTG-3' for *alt-PTC-IVS6-p53* mRNA. Both primer pairs had comparable amplification efficiency, based on standard curve analysis. 18S mRNA was used as a normalization control. The values are mean RNA levels ( $\pm$  SEM) from three independent experiments relative to the level of normally spliced p53 mRNA in the NP, which was given a value of 1.

## UPF1 EXON 10/intron 10/EXON 11

GATGCAGAGCGCATTGAAAACGTTTGCCGTGGATGAGACCTCGGTGTCTGGCTACATCT  
ACCACAAGCTGTTGGGCCACGAGGTGGAGGACGTAATCATCAAGTGCCAGCTGCCAAG  
CGCTTACGGCGCAGGGCCTCCCCGACCTCAACCACTCCCAG/gtgcgcgccgtcctca  
gcgcgcggggctcgccecatgggccggga cgcaagcggaggctgcccctaacggccgct  
tgtattgaag/GTTTATGCCGTGAAGACTGTGCTGCAAAGACCACTGAGCCTGATCCAG  
GGCCCCCAGGCACGGGGAAGACGGTGACGTCGGCCACCATCGTCTACCACCTGGCCCCG  
GCAAGGCAACGG

## UPF1 EXON 21/intron 21/EXON 22/intron 22/EXON 23

GCCGGCCTTCCAGCATGTA CTTCCAGACCCATGACCAGATTGGCATGATCAGTGCCGGC  
CCTAGCCACGTGGCTGCCATGAACATTC C C C C T T C A A C C T G G T C A T G C C A C C C A T  
GCCACCGCCTGGCTATTTGGACAAGCCAACGGGCCTGCTGCAG/gtgagcatctgtgg  
ctgcggtgggtgtggccctcctgagagctcttgagggtgtgcttgtctgcgaggccct  
ggcctccttcgatcaccctggactgctgtctttcag/GGCGAGGCACCCCGAAAGGCA  
AGACTGGTCGTGGGGGACGCCAGAAGAACCGCTTTGGGCTTCCTGGACCCAGCCAGACT  
AACCTCCCCAACAGCCAAGCCAGCCAGGATGTGGCGTCACAGCCCTTCTCTCAGGGCGC  
CCTGACGCAGGGCTACATCTCCATGAGCCAGCCTTCCAGATGAGCCAGCCCGGCCTCT  
CCCAGCCGGAGCTGTCCCAG/gtgagcccggccctgggacgggacttacctgagtgagg  
gtggggcta tgcacctgaaacattccctctgaagagcccagagagctggcctggcca  
tgtccactgtctgaattacctgtccctgggctggggcatcagagtggtctcctgggt  
cttagtttggggacgggttttccattctttctctggggctgctgagggctgggtggat  
gtgagcacccttggcctgtggcttgccttacctcctgacctgtctttcag/GACAGTTA  
CCTTGGTGACGAGTTTAAATCACAAATCGACGTGGCGCTCTCACAGGACTCCACGTACC  
AGGGAGAGCGGGCTTACCAGCATGGCGGGGTGACGGGGCTGTCCCAGTATTTAAAG

---

Legend:

EXON / intron

**Mutations**

Exon/intron Splicing Enhancers (SE)

---

### Supplementary Figure 2. Many *UPF1* mutations in ASC tumors are within or proximal to known splicing *cis* elements.

The program ESE Finder, which predicts binding sites for 4 of the >10 known ESE/ISE-binding proteins (SRSF1, SRSF2, SRSF5, SRSF6)<sup>9,22</sup>, was used to locate several predicted ESEs and ISEs in the regions of the *UPF1* gene mutated in ASC tumors. Four of the 19 mutations in the exon 10-intron 10-exon 10 region were within predictable ESEs/ISEs. Several of the other mutations in the exon 10-intron 10-exon 10 region were closely adjacent to predicted ESEs and ISE core sequences (6 of the mutations were within 3 nt of these sequences). These ESE/ISE core-proximal mutations could disrupt intron 10 splicing, particularly since this intron is very small (85 nt) and has a high GC content (73%), which is likely to make its splicing particularly sensitive to modest alterations in pro-splicing signals in the adjacent exons<sup>9,23</sup>.

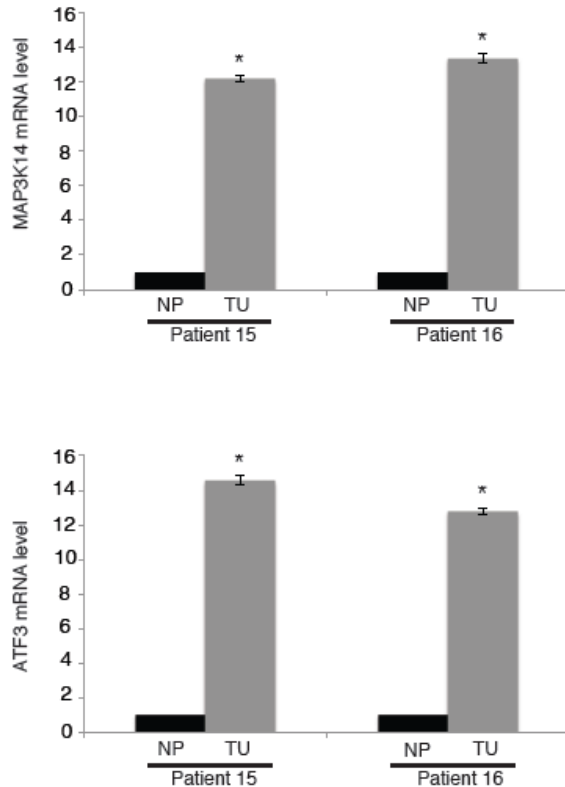

### Supplementary Figure 3. Endogenous NMD substrates are dramatically upregulated in ASC tumors.

We and others have shown that one consequence of disruption of *UPF1* is the upregulation of dominant-negative forms of tumor suppressor genes<sup>7,24</sup>. *UPF1* has also been shown to post-transcriptionally regulate, through NMD, several other mRNAs encoding proteins that can potentially influence tumor growth, including those involved in stress regulation<sup>16</sup> and cell differentiation<sup>25</sup>. Indeed, as shown in this figure, RT-qPCR expression-analysis of frozen tumor (TU) and normal adjacent pancreas (NP) from two ASC patients demonstrated that the NMD substrates, ATF3 and MAP3K14 mRNA, are dramatically upregulated in ASC tumors. The values shown are the average fold change (mean  $\pm$  SEM) in TU tissue relative to NP (the former was given a value of 1) from three independent experiments. 18S mRNA was used as the endogenous control. Statistical analysis was performed using the Student's t test; \* $P < 0.05$ .

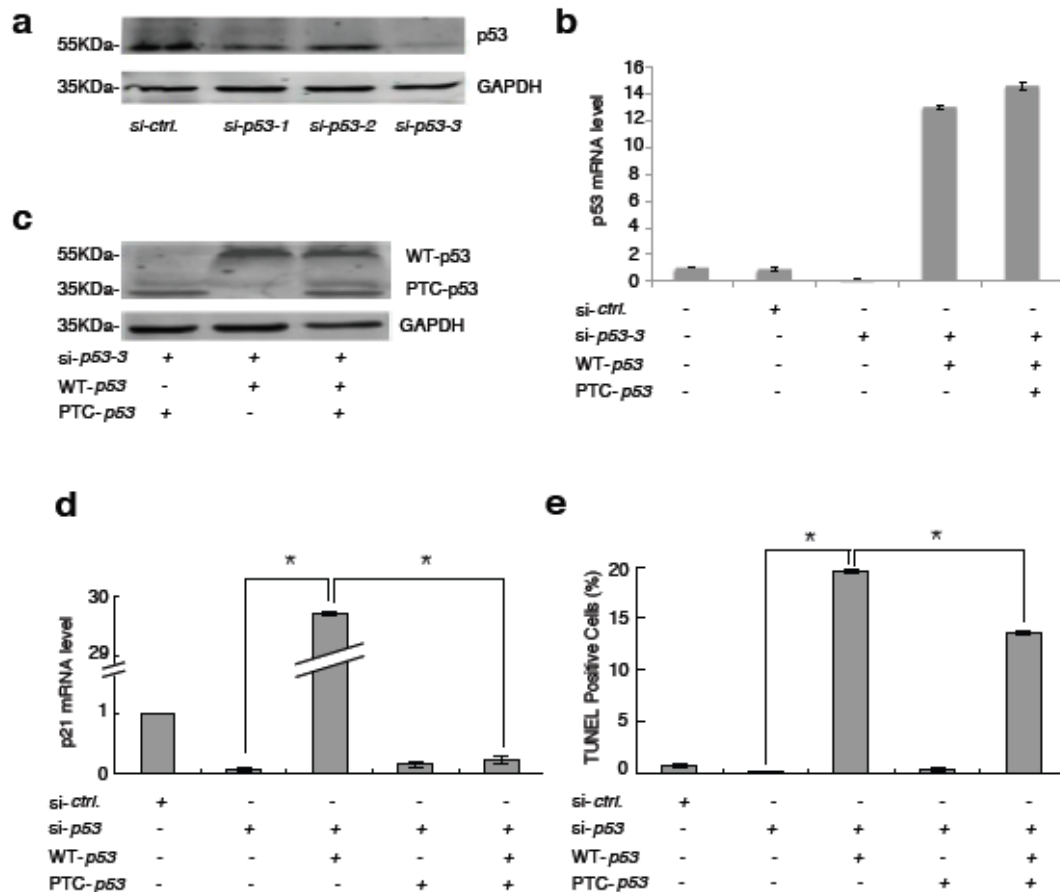

**Supplementary Figure 4. Evidence that the *alt-PTC-IVS6-p53* mRNA encodes a dominant-negative p53 protein.**

(a) Western blot analysis of PANC-1 cells transfected with 3 independent p53 siRNAs and a negative control siRNA (si-ctrl). 80 nmoles of siRNAs was transfected. See **Supplementary table 7** for siRNA sequences. (b) RT-qPCR analysis of *p53* mRNA levels in PANC-1 cells, treated as indicated in the panel. (c) Western blot analysis of p53 protein levels in PANC-1 cells, treated as indicated in the panel. (d) RT-qPCR analysis of *p21* mRNA expression in PANC-1 cells transfected as indicated in the panel. PTC-p53 is a plasmid expressing the protein encoded by the *Alt-PTC-IVS6-p53* mRNA. (e) TUNEL analysis of PANC-1 cells transfected as in panel d. Values in panels **b**, **d**, and **e** are the average fold change (mean  $\pm$  SEM) from three independent experiments relative to the control, which was given a value of 1. 18S mRNA was used as the endogenous control. Statistical analysis was performed using the Student's t test; \* $P < 0.05$ .

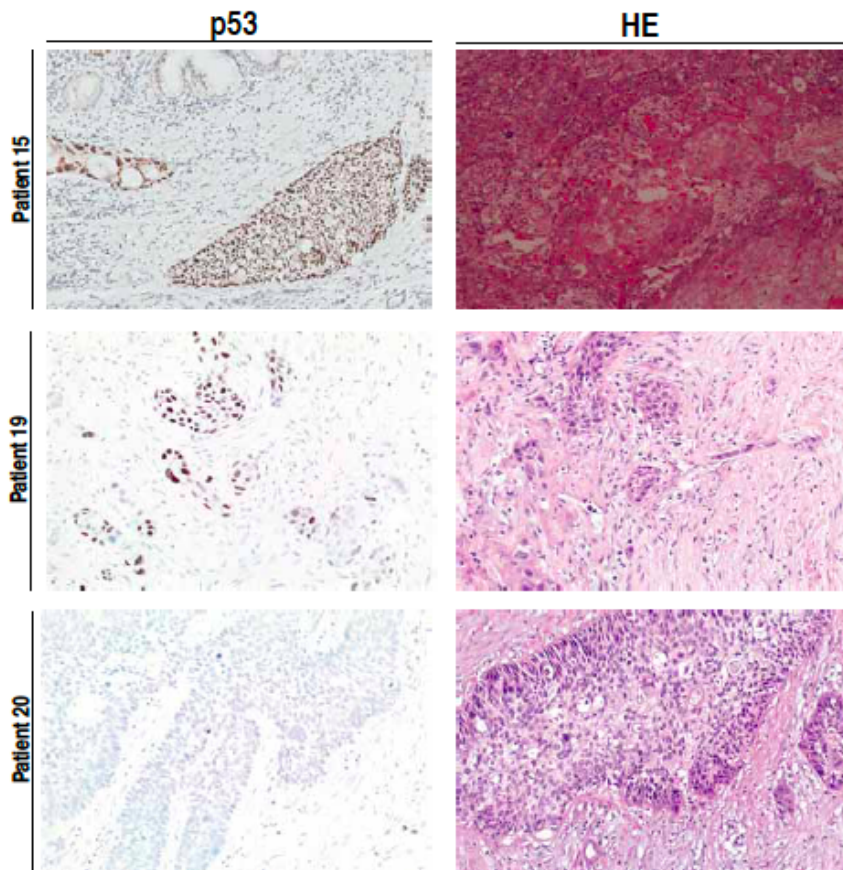

**Supplementary Figure 5. p53 immunohistochemical analysis.**

Immunohistochemical analysis of two patient tumors exhibiting strong p53 nuclear staining (from patients 15 and 19) and a patient lacking detectable p53 (patient 20). **Supplementary table 1** provides a summary of all patient tumors evaluated for p53 status.

**Supplementary Table 1. Summary of 23 ASC patients**

| Supplementary Table 1 | UPF1 mutations                                                      | Confirmed UPF1 mutations                             | UPF1 IHC (Tu level compared to NT) | KRAS mutation | p53 IHC        | UPF2       | UPF3A      | UPF3B      | Sample: FFPE vs Frozen tissue | Sample origin                                                           | Clinical info: sex, age of diag. |
|-----------------------|---------------------------------------------------------------------|------------------------------------------------------|------------------------------------|---------------|----------------|------------|------------|------------|-------------------------------|-------------------------------------------------------------------------|----------------------------------|
| Patient 1             | IVS10+31G>A                                                         | no residual sample                                   | ~5%                                | Not Tested    | Not Tested     | Not Tested | Not Tested | Not Tested | FFPE                          | Zhongshan Hospital, Fudan University, Shanghai, China                   | 41-year-old man                  |
| Patient 2             | c.1401C>T<br>IVS10+21G>A<br>IVS10+32C>T<br>IVS10+34C>T<br>c.1463G>T | no residual sample                                   | ~5%                                | Not Tested    | Not Tested     | WT         | WT         | WT         | FFPE                          | Zhongshan Hospital, Fudan University, Shanghai, China                   | 73-year-old female               |
| Patient 3             | c.1378C>T<br>IVS10+26G>A<br>IVS10+22C>T                             | no residual sample                                   | ~5%                                | Not Tested    | Not Tested     | Not Tested | Not Tested | Not Tested | FFPE                          | Zhongshan Hospital, Fudan University, Shanghai, China                   | 54-year-old female               |
| Patient 4             | c.1302G>A<br>IVS10+31G>A<br>IVS10+24C>A                             | no residual sample                                   | ~5%                                | Not Tested    | Not Tested     | Not Tested | Not Tested | Not Tested | FFPE                          | Zhongshan Hospital, Fudan University, Shanghai, China                   | 57-year-old female               |
| Patient 5             | c.1401C>T<br>IVS10+32C>T<br>IVS10+34C>T<br>c.1463G>T                | c.1401C>T<br>IVS10+32C>T<br>IVS10+34C>T<br>c.1463G>T | ~5%                                | WT            | P              | WT         | WT         | WT         | FFPE                          | Zhongshan Hospital, Fudan University, Shanghai, China                   | 56-year-old female               |
| Patient 6             | IVS10+7G>A                                                          | IVS10+7G>A                                           | ~5%                                | G12D (G35A)   | P              | Not Tested | Not Tested | Not Tested | FFPE                          | Zhongshan Hospital, Fudan University, Shanghai, China                   | 68-year-old man                  |
| Patient 7             | c.1408G>T<br>IVS10+25C>T                                            | no residual sample                                   | ~5%                                | Not Tested    | Not Tested     | WT         | WT         | WT         | FFPE                          | Zhongshan Hospital, Fudan University, Shanghai, China                   | 75-year-old man                  |
| Patient 8             | c.1401C>T<br>IVS10+31G>A<br>IVS10+32C>T<br>IVS10+34C>T<br>c.1463G>T | no residual sample                                   | ~5%                                | Not Tested    | Not Tested     | Not Tested | Not Tested | Not Tested | FFPE                          | Zhongshan Hospital, Fudan University, Shanghai, China                   | 50-year-old man                  |
| Patient 9             | IVS10+17G>A                                                         | no residual sample                                   | ~5%                                | Not Tested    | Not Tested     | Not Tested | Not Tested | Not Tested | FFPE                          | Zhongshan Hospital, Fudan University, Shanghai, China                   | 72-year-old man                  |
| Patient 10            | c.1411C>T<br>IVS10+13G>A                                            | c.1426 G>A                                           | ~5%                                | G12D (G35A)   | P              | WT         | WT         | WT         | FFPE                          | Zhongshan Hospital, Fudan University, Shanghai, China                   | 47-year-old female               |
| Patient 11            | IVS22+48C>T<br>c.3300G >A                                           | IVS22+48C>T                                          | ~5%                                | WT            | P              | Not Tested | Not Tested | Not Tested | FFPE                          | Zhongshan Hospital, Fudan University, Shanghai, China                   | 54-year-old man                  |
| Patient 12            | IVS22+83C>T<br>c.3325C>T                                            | no residual sample                                   | ~5%                                | G12D (G35A)   | P              | Not Tested | Not Tested | Not Tested | FFPE                          | Zhongshan Hospital, Fudan University, Shanghai, China                   | 56-year-old man                  |
| Patient 13            | c.2916C>T<br>IVS21+44A>G                                            | no residual sample                                   | ~5%                                | Not Tested    | Not Tested     | Not Tested | Not Tested | Not Tested | FFPE                          | Zhongshan Hospital, Fudan University, Shanghai, China                   | 67-year-old female               |
| Patient 14            | c.2928G>A<br>IVS22+128C>T                                           | no residual sample                                   | ~5%                                | G12V (G35T)   | P              | Not Tested | Not Tested | Not Tested | FFPE                          | Zhongshan Hospital, Fudan University, Shanghai, China                   | 61-year-old man                  |
| Patient 15            | c.3239A>T                                                           | c.3239A>T                                            | ~5%                                | G12V (G35T)   | P (Fig. S2)    | WT         | WT         | WT         | Frozen tissue                 | Changhai Hospital, Second Military Medical University, Shanghai, China. | 57-year-old man                  |
| Patient 16            | IVS22+8 C>T                                                         | IVS22+8 C>T                                          | ~5%                                | G12D (G35A)   | Not Tested     | Not Tested | Not Tested | Not Tested | Frozen tissue                 | Changhai Hospital, Second Military Medical University, Shanghai, China. | 47-year-old female               |
| Patient 17            | WT                                                                  | Not Tested                                           | ~85%                               | WT            | Not Tested     | Not Tested | Not Tested | Not Tested | Frozen tissue                 | Changhai Hospital, Second Military Medical University, Shanghai, China. | 70-year-old female               |
| Patient 18            | WT                                                                  | Not Tested                                           | ~63%                               | G12V (G35T)   | Not Tested     | Not Tested | Not Tested | Not Tested | Frozen tissue                 | Changhai Hospital, Second Military Medical University, Shanghai, China. | 62-year-old man                  |
| Patient 19            | c.3256G>A                                                           | Not Tested                                           | Not Tested                         | WT            | P (Fig. S2)    | Not Tested | Not Tested | Not Tested | FFPE                          | MD Anderson Cancer Center, Houston, TX, U.S.A.                          | 56-year-old man                  |
| Patient 20            | WT                                                                  | Not Tested                                           | Not Tested                         | WT            | Neg. (Fig. S2) | Not Tested | Not Tested | Not Tested | FFPE                          | MD Anderson Cancer Center, Houston, TX, U.S.A.                          | 48-year-old female               |
| Patient 21            | WT                                                                  | Not Tested                                           | Not Tested                         | g-9C>T        | Neg.           | Not Tested | Not Tested | Not Tested | FFPE                          | MD Anderson Cancer Center, Houston, TX, U.S.A.                          | 59-year-old female               |
| Patient 22            | c.1413C>A<br>IVS10+40C>T                                            | c.1413C>A<br>IVS10+40C>T                             | Not Tested                         | G12V (G35T)   | Neg.           | Not Tested | Not Tested | Not Tested | FFPE                          | MD Anderson Cancer Center, Houston, TX, U.S.A.                          | 73-year-old female               |
| Patient 23            | WT                                                                  | Not Tested                                           | Not Tested                         | WT            | Neg.           | Not Tested | Not Tested | Not Tested | FFPE                          | MD Anderson Cancer Center, Houston, TX, U.S.A.                          | 77-year-old female               |



| <b>Supplementary Table 2. Genomic <i>UPF1</i> mutations in pancreatic and lung tumors</b> |                                        |
|-------------------------------------------------------------------------------------------|----------------------------------------|
| <b>Tumor</b>                                                                              | <b>Mutations No. of patients/total</b> |
| <b>Pancreas</b>                                                                           |                                        |
| Adenosquamous carcinoma                                                                   | 18/23 (78%)                            |
| Ductal adenocarcinoma                                                                     | 0/24                                   |
| Solid pseudopapillary neoplasm                                                            | 0/3                                    |
| Neuroendocrine carcinoma                                                                  | 0/2                                    |
| <b>Lung</b>                                                                               |                                        |
| Squamous carcinoma                                                                        | 0/21                                   |

**Supplementary Table 3. Primers used for *UPF1* DNA sequencing**

| Target        | Sequence |                       | Target            | Sequence |                       |
|---------------|----------|-----------------------|-------------------|----------|-----------------------|
| UPF1<br>Exon1 | f        | GCAGTTCCTGCTCTAGGCTG  | UPF1<br>Exon12-13 | f        | AGCCCAGGATGTTGAGGCTG  |
|               | r        | GATTGCAGGACCTGGGGCAG  |                   | r        | TTCCAGGCAGCGAGATGTCC  |
|               | F        | GCAGTTCCTGCTCTAGGCTG  |                   | F        | TCACACCACTGCACTCCAGC  |
|               | R        | TAAGCTCAGGCCGAGCCAGAG |                   | R        | ACAACTGAGCGCAGAGAGGC  |
| UPF1<br>Exon2 | f        | GGCATGGACATGGCTCTGTG  | UPF1<br>Exon14-15 | f        | TCACCACAGCCTGGACCATG  |
|               | r        | TCAGGGTGTCTGGAGGTTGCT |                   | r        | TGCCCTGACCTCAAGCAGTG  |
|               | F        | GGTTAGACCAGCTGTGTGGG  |                   | F        | TGTCTGGGAGGGACAGCTTG  |
|               | R        | CACCTCCTGACCGGTAACAG  |                   | R        | GAAGCTGATGGGCCAGTTCC  |
| UPF1<br>Exon3 | f        | CAGCAGGACTCTCCTTGGAG  | UPF1<br>Exon16-17 | f        | AGGACCTGCAGCACTGTAGC  |
|               | r        | AGATCAGCGGGTGTGCCAAG  |                   | r        | TCCTGGGCCATTCTGAGCTC  |
|               | F        | TGCTCCTTATCCCCTCGGAG  |                   | F        | TTGCCCTGTGTCTGAACTCA  |
|               | R        | ACCCAGGTTTGTAGCGTG    |                   | R        | AGGAGACCAAGTGTGCCCGAG |
| UPF1<br>Exon4 | f        | GGATGAGGTGTGACTGCCTC  | UPF1<br>Exon18    | f        | TCTAGCCTGGGTGACAGAGC  |
|               | r        | AACGCTCTCATGCCTCACCC  |                   | r        | CTGCTCAGAGTCCTCTGACC  |
|               | F        | ATGGACCGTGAACGGTACCG  |                   | F        | GCCTGCTGGCTGATAGTGAC  |
|               | R        | TGGAGGACAACTCCCTGGAG  |                   | R        | GGAAGTGAGGACCGATGAGC  |
| UPF1<br>Exon5 | f        | CAGAGCTCAAGTGCACAGGG  | UPF1<br>Exon19-20 | f        | GTGTGCAGGGTCAGTGGCTTG |
|               | r        | TCTCACTGGGTCAAGCCGTC  |                   | r        | AAGCTGCAGCCATGGGAACG  |
|               | F        | ATGCAGGGCATGCCCTTTG   |                   | F        | TCTTGGACCGTCCTGTGAGA  |
|               | R        | TCCCCGCAACCAGAAACCAC  |                   | R        | ATCCCCGGTGTGAGGACAAGG |

|                   |   |                      |                   |   |                       |
|-------------------|---|----------------------|-------------------|---|-----------------------|
| UPF1<br>Exon6     | f | CCTGTGTGGCATGGAGTTCC | UPF1<br>Exon21-23 | f | ATCTTCAGCCTGGGCAGAGC  |
|                   | r | ACATCAGCTCCCACAGCCTG |                   | r | ATACCACCCCTCCAGTGCAG  |
|                   | F | AGGGTTCTCCTTGCAGGTGG |                   | F | CAGGACAGATGTGCAGCTCC  |
|                   | R | CTCTGGAAGCCTGAGGAGAG |                   | R | CCCATCCTTCTCCTTGAGGC  |
| UPF1<br>Exon7-8   | f | ACGGCAGAGGCTTGCTGTAG | UPF1<br>Intron23  | f | ATCGACGTGGCGCTCTCACAG |
|                   | r | AAGAGCAGTGGAGGGCGATG |                   | r | CCTGTTGCTCACACAGTGGTG |
|                   | F | CTGTGCTGGAGGCTAACC   |                   | F | ACTCCACGTACCAGGGAGAG  |
|                   | R | AGCATGAGATGCTGGCCCAG |                   | R | CGTTGCTTAGCTCTTCCGCC  |
| UPF1<br>Exon9     | f | CGGCTCATGGTGAGGTAGAG | UPF1<br>Exon24    | f | GTACCTGTGGGGCTCAGGTC  |
|                   | r | GAACCCCACTCCACAGTGAC |                   | r | GGGTTTGTCAAGGCTGCTGC  |
|                   | F | AGCGTTTGGTGCAGAGCCAG |                   | F | TGCCCTTCTCCCTCCTGACAG |
|                   | R | AGATGCCACAGGTGGCAACC |                   | R | TACCCGGTGCATGCCTCTAC  |
| UPF1<br>Exon10-11 | f | GTCACTGTGGAGTGGGGTTC |                   |   |                       |
|                   | r | AGAGAGCGGTAGGCACCATG |                   |   |                       |
|                   | F | ACTCAGGATGTCGGAGAGGC |                   |   |                       |
|                   | R | CACGTGCTCTCTTCGGTGTG |                   |   |                       |

| Supplementary Table 4. RT-qPCR primers |           |                             |
|----------------------------------------|-----------|-----------------------------|
| Target                                 | Sequence  |                             |
| 18s (Endogenous Control)               | REALF     | AGTCTAGAGCCACCGTCCAG        |
|                                        | REALR     | CCTACCTAGAATGTGGCTG         |
| WT p53 mRNA                            | Realfex5  | CTGCTCAGATAGCGATGGTCTGGC    |
|                                        | Realrex7  | TTGTAGTGGATGGTGGTACA GTCA G |
| Alt-PTCIVS6-p53 mRNA                   | Realfin6  | TGGCTCATGCCTGTAATCCCAGCA C  |
|                                        | Realrin10 | CCTCAGCCTCCCGAGTA GGTA GCTG |
| p21                                    | REALF     | AGGTGGACCTGGAGACTCTCAGGGTC  |
|                                        | REALR     | AAGGCAGAAGATGTAGAGCGGGCC    |

| <b>Supplementary Table 5. Primers used for <i>UPF1</i> mini-gene construction and analysis</b> |          |                                   |
|------------------------------------------------------------------------------------------------|----------|-----------------------------------|
| Target                                                                                         | Sequence |                                   |
| Minigene<br>Construct E10-11                                                                   | F        | GGAATTCCATATGCGTCTTCTCCCATCACTGCC |
|                                                                                                | R        | GGAATTCCATATGACACGGAACTCACGCTGCTG |
| Minigene<br>Construct E21-23                                                                   | F        | GGAATTCCATATGTTCCCAGCAGACTCTCCTCG |
|                                                                                                | R        | GGAATTCCATATGCCTCCCCGACTCTGATGAGG |
| Minigene<br>Expression<br>Analysis                                                             | F        | CAACTTCAAGCTCCTAAGCCACTGC         |
|                                                                                                | R        | TAGGATCCGGTCACCAGGAAGTTGGTTAAATCA |

| Supplementary Table 6. Primers used for site-direct mutagenesis of the <i>UPF1</i> hybrid mini-gene |                                      |
|-----------------------------------------------------------------------------------------------------|--------------------------------------|
| Mutation site                                                                                       | Sequence                             |
| IVS10+31G>A                                                                                         | F CGCGGGGCCTCACCCATGGGCCG            |
|                                                                                                     | R CGGCCCATGGGTGAGGCCCGCG             |
| c.1401C>T                                                                                           | F ACGGCGCAGGGTCTCCCCGACCT            |
|                                                                                                     | R AGGTCGGGGAGACCCTGCGCCGT            |
| IVS10+21G>A                                                                                         | F GCGAGGCCCGTGCGCTGAGGAC             |
|                                                                                                     | R GTCCTCAGCGCACGGGGCCTCGC            |
| IVS10+32C>T                                                                                         | F GCGGGGCCTCGTCCATGGGCCGG            |
|                                                                                                     | R CCGGCCCATGGACGAGGCCCGCG            |
| IVS10-34C>T                                                                                         | F CGGGACGCAAGTGGAGGCTGCCC            |
|                                                                                                     | R GGGCAGCCTCCACTTGCCTCCCG            |
| c.1463G>T                                                                                           | F CTGTGCTGCAAAGACCACTGATCCTGATCCAGG  |
|                                                                                                     | R CCTGGATCAGGATCAGTGGTCTTTGCAGCACAG  |
| c.1378C>T                                                                                           | F TCAAGTGCCAGCTGTCCAAGCGCTTCACG      |
|                                                                                                     | R CGTGAAGCGCTTGGACAGCTGGCACTTGA      |
| IVS10-26G>A<br>IVS10-22C>T                                                                          | F GCAAGCGGAGGCTACCCTTAACGGCCGCTTG    |
|                                                                                                     | R CAAGCGGCCGTTAAGGGTAGCCTCCGCTTGC    |
| c.1302G>A                                                                                           | F GAAAACGTTTGCCGTGGATGAAACCTCGGTGTC  |
|                                                                                                     | R GACACCGAGGTTTCATCCACGGCAAACGTTTTTC |
| IVS10-24C>A                                                                                         | F CGGCCGTTAGGTGCAGCCTCCGC            |

|             |   |                                    |
|-------------|---|------------------------------------|
|             | R | GCGGAGGCTGCACCTAACGGCCG            |
| IVS10+7G>A  | F | GCTGAGGACGGTGCGCACCTGGG            |
|             | R | CCCAGGTGCGCACCGTCCTCAGC            |
| c.1408G>T   | F | GCAGGGCCTCCCCTACCTCAACCACTC        |
|             | R | GAGTGGTTGAGGTAGGGGAGGCCCTGC        |
| IVS10-25C>T | F | AAGCGGAGGCTGTCCCTAACGGCCG          |
|             | R | CGGCCGTTAGGGACAGCCTCCGCTT          |
| IVS10-17G>A | F | GAGGCTGCCCCTAACAGCCGCTTGTATTG      |
|             | R | CAATACAAGCGGCTGTTAGGGGCAGCCTC      |
| c.1411C>T   | F | GGCCTCCCCGACTTCAACCACTCCC          |
|             | R | GGGAGTGGTTGAAGTCGGGGAGGCC          |
| IVS10-13G>A | F | GCTGCCCCTAACGGCCACTTGTATTGAAGGTTTA |
|             | R | GCTGCCCCTAACGGCCACTTGTATTGAAGGTTTA |
| IVS22+48C>T | F | GAGTGAGGGTGGGGCTACGCACCTGAAACATTC  |
|             | R | GAGTGAGGGTGGGGCTACGCACCTGAAACATTC  |
| c.3300G >A  | F | TCACAGGACTCCACATAACCAGGGAGAGCG     |
|             | R | CGCTCTCCCTGGTATGTGGAGTCCTGTGA      |
| IVS22-83C>T | F | GGACGGGTTTTCCATTTTTTCTCTGGGGCTGC   |
|             | R | GCAGCCCCAGAGAAAAAATGGAAAACCCGTCC   |
| c.3325C>T   | F | GCGGGCTTACCAGTATGGCGGGGTGAC        |
|             | R | GTCACCCCGCCATACTGGTAAGCCCGC        |
| c.2916C>T   | F | TGATCAGTGCCGGTCCTAGCCACGTGG        |

|                  |   |                                |
|------------------|---|--------------------------------|
|                  | R | CCACGTGGCTAGGACCGGCACTGATCA    |
| IVS21-44A>G      | F | TGCTTGTCTGCGGGGCCCTGGCCTC      |
|                  | R | GAGGCCAGGGCCCCGCAGACAAGCA      |
| c.2928G>A        | F | GGCCCTAGCCACGTAGCTGCCATGAAC    |
|                  | R | GTTTCATGGCAGCTACGTGGCTAGGGCC   |
| IVS22+128C><br>T | F | TACCTGTCCCTGGGTTGGGGTCATCAGAG  |
|                  | R | CTCTGATGACCCCAACCCAGGGACAGGTA  |
| c.3239A>T        | F | GGAGCTGTCCCAGGTCAGTTACCTTGGTG  |
|                  | R | CACCAAGGTAACCTGACCTGGGACAGCTCC |

| <b>Supplementary Table 7. p53 siRNAs</b> |                          |
|------------------------------------------|--------------------------|
|                                          | Sequence                 |
| Si - h-p53_001                           | GGACAUACCAGCUUAGAUU dTdT |
| Si - h-p53_002                           | GCACAGAGGAAGAGAAUCU dTdT |
| Si - h-p53_003                           | GACUCCAGUGGUAUUCUAC dTdT |



## Methods

### Subjects

We evaluated a set of tumors and corresponding normal tissues from 23 patients with Adenosquamous Carcinoma (ASC) of the pancreas (**Supplementary Table 1**), as well as tumors from 24 patients with ductal adenocarcinoma, 3 patients with solid pseudopapillary neoplasm, 2 patients with neuroendocrine carcinoma, and 21 lung squamous cell carcinoma (**Supplementary Table 2**). Of the 23 ASC patient specimens, 19 were formalin-fixed paraffin-embedded (FFPE) tissue sections provided by the Department of Pathology, Zhongshan Hospital, Shanghai, China and the University of Texas M. D. Anderson Cancer Center, Houston, TX, USA. The other 4 ASC patient specimens were frozen immediately after collection (during routine clinical protocols) from The Third General Surgery Department, Changhai Hospital, Shanghai. All patients were provided written informed consent, and the approval for the study was provided by the institutional ethics review board (IRB) of the University of Texas M. D. Anderson Cancer Center, the University of California San Diego, the Second Military Medical University, Fudan University, and Tongji University School of Medicine, Shanghai, China.

### DNA/RNA sequencing and analysis

Genomic DNA from the frozen samples was extracted using the DNAeasy Blood & Tissue Kit (Qiagen). Genomic DNA from the FFPE samples were extracted using QIAamp DNA FFPE Tissue Kit (Qiagen). All *UPF1* exons and flanking intron sequences were amplified by nested PCR using the primers described in **Supplementary Table 3**.

Total RNA from the patient's samples and cell lines was extracted using Trizol (Invitrogen). To prevent contamination with genomic DNA, the samples were treated with RNase-free DNase I (Fermentas). The synthesis of complementary DNA (cDNA) was performed using the PrimeScript™ RT

reagent Kit (Takara). Quantitative real-time reverse transcription PCR (RT-qPCR) analysis was performed using the relative quantification method ( $\Delta\Delta C_T$ ) in a RotorGene RG-3000 thermal cycler system (Corbett Research). 18S mRNA was used as the endogenous controls. Primers are described in **Supplementary Table 4**. All samples were evaluated in triplicate.

### **Constructs, mutagenesis and analysis of UPF1 minigenes**

Wild-type genomic sequences from human *UPF1* (nt 22,779-23,570 and nt 33,138-34,490 [RefSeq accession number NC\_000019.9]) were amplified with the primers described in **Supplementary Table 5**. The PCR products were cloned into the *NdeI* site of the vector pTBNde(min), a gift from Dr. Francisco E. Baralle (International Centre for Genetic Engineering and Biotechnology, Italy). Point mutations were introduced by site-direct mutagenesis using the KOD-Plus-Neo kit (Toyobo Inc.) and the *DpnI* enzyme (Takara Inc.). The primer sequences used for site-directed mutagenesis are listed in **Supplementary Table 6**. Mini-genes RT-PCR analysis was performed using the primers described in **Supplementary Table 5**.

### **Cell culture and transfections**

Human PANC-1 (pancreatic ductal carcinoma) cells and human HEK293 (embryonic kidney) cells were maintained in DMEM supplemented with 10% FBS (Thermo) at 37°C under 5% CO<sub>2</sub>. The cells were transfected using Lipofectamine 2000 (Invitrogen, Carlsbad, CA) and harvested for RNA extraction 48 h after transfection. The small interfering RNAs (siRNAs) transfected to deplete p53 are described in **Supplementary Figure 7**.

### **Protein analysis**

Immunohistochemical analysis was performed on paraffin-embedded sections, as previously described<sup>26</sup>. Sections were deparaffinized two times in xylene, followed by serial dilutions of ethanol. After heat-induced antigen retrieval in

antigen unmasking solution (Vector Laboratory, Inc., Burlingame, USA), the internal peroxidase activity was quenched by incubation with 3% hydroperoxide in methanol for 15 min. Sections were blocked in Avidin solution for 15 min, incubated in Biotin solution for 15 min (Vector Laboratory, Inc.), incubated in 5% bovine serum albumin and 20% goat serum in PBS for 1 h, all at room temperature. Sections were then incubated overnight at 4°C with primary antibodies against UPF1 (Rabbit monoclonal, Abcam, ab109363) and p53 (Novocastra#NCL-L-p53-D07) at a 1:100 dilution.

### **TUNEL staining and analysis**

The staining of apoptotic cells was carried out using the ApopTag Plus Fluorescein In Situ Apoptosis Detection Kit (Millipore, Inc.). TUNEL staining detection and quantification was performed by counting at least 1000 cells in five randomly selected high-power fields (magnification, ×200).

### **Statistical analysis**

Pairwise comparisons were performed by two-tailed Student's *t*-test using Excel software (Microsoft). Data is expressed as mean ± SEM.

## Supplementary References

21. Lukas, J. *et al.* Alternative and aberrant messenger RNA splicing of the mdm2 oncogene in invasive breast cancer. *Cancer Res.* **61**, 3212–9 (2001).
22. Cartegni, L., Wang, J., Zhu, Z., Zhang, M. Q. & Krainer, A. R. ESEfinder: A web resource to identify exonic splicing enhancers. *Nucleic Acids Res.* **31**, 3568–71 (2003).
23. Berget, S. M. Exon recognition in vertebrate splicing. *J. Biol. Chem.* **270**, 2411–4 (1995).
24. Holbrook, J. A., Neu-Yilik, G., Hentze, M. W. & Kulozik, A. E. Nonsense-mediated decay approaches the clinic. *Nat Genet* **36**, 801–808 (2004).
25. Bruno, I. G. *et al.* Identification of a microRNA that activates gene expression by repressing nonsense-mediated RNA decay. *Mol. Cell* **42**, 500–10 (2011).
26. Song, H. W. *et al.* The RHOX homeobox gene cluster is selectively expressed in human oocytes and male germ cells. *Hum. Reprod.* **28**, 1635–46 (2013).
